# Supplementary material
Source: publisher site journal article supplement (https://www.dovepress.com/article/543962)
Supplement: Supplementary file 1 [file Supplementary%20material.pdf]

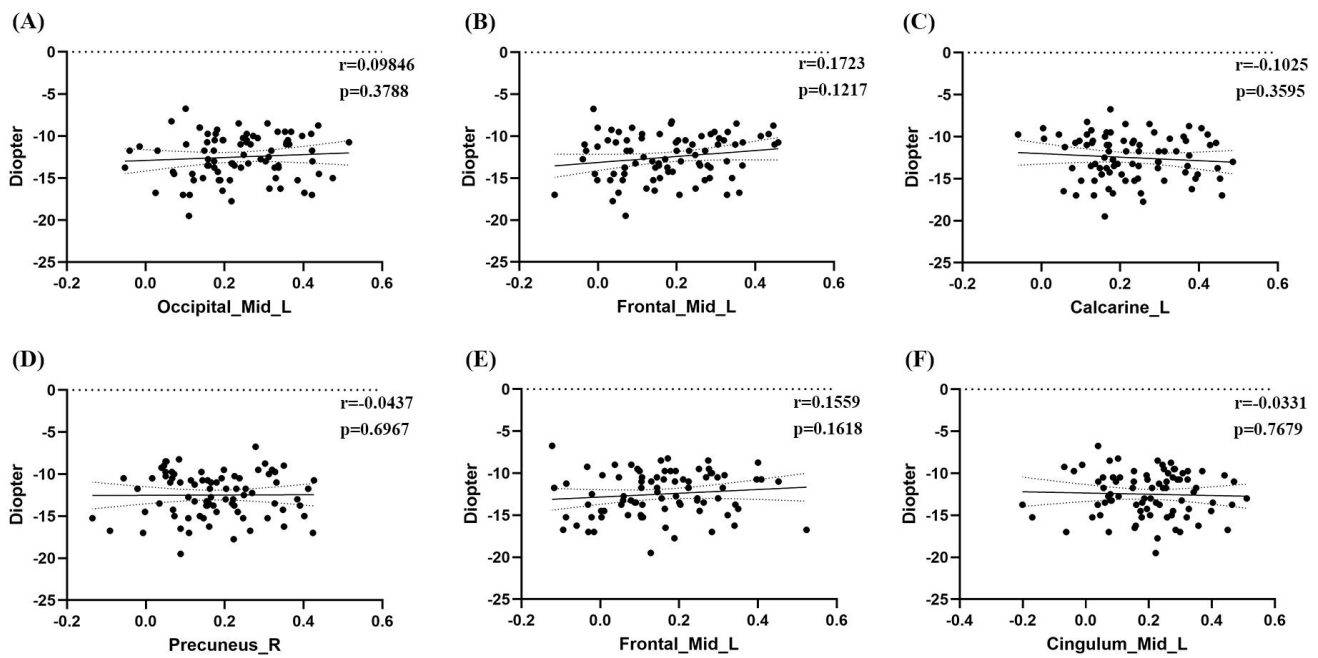

Figure S1. Spearman correlations between functional connectivity (FC) and diopter for the left amygdala with Occipital\_Mid\_L (A) and Frontal\_Mid\_L (B); Spearman correlations between FC and diopter for the right amygdala with Calcarine\_L (C), Precuneus\_R (D), Frontal\_Mid\_L (E), and Cingulum\_Mid\_L (F) (No statistically significant correlations were observed). Calcarine\_L, left calcarine fissure and surrounding cortex; Cingulum\_Mid\_L, left median cingulate and paracingulate gyri; Frontal\_Mid\_L, left middle frontal gyrus; Occipital\_Mid\_L, left middle occipital gyrus; Precuneus\_R, the right precuneus.

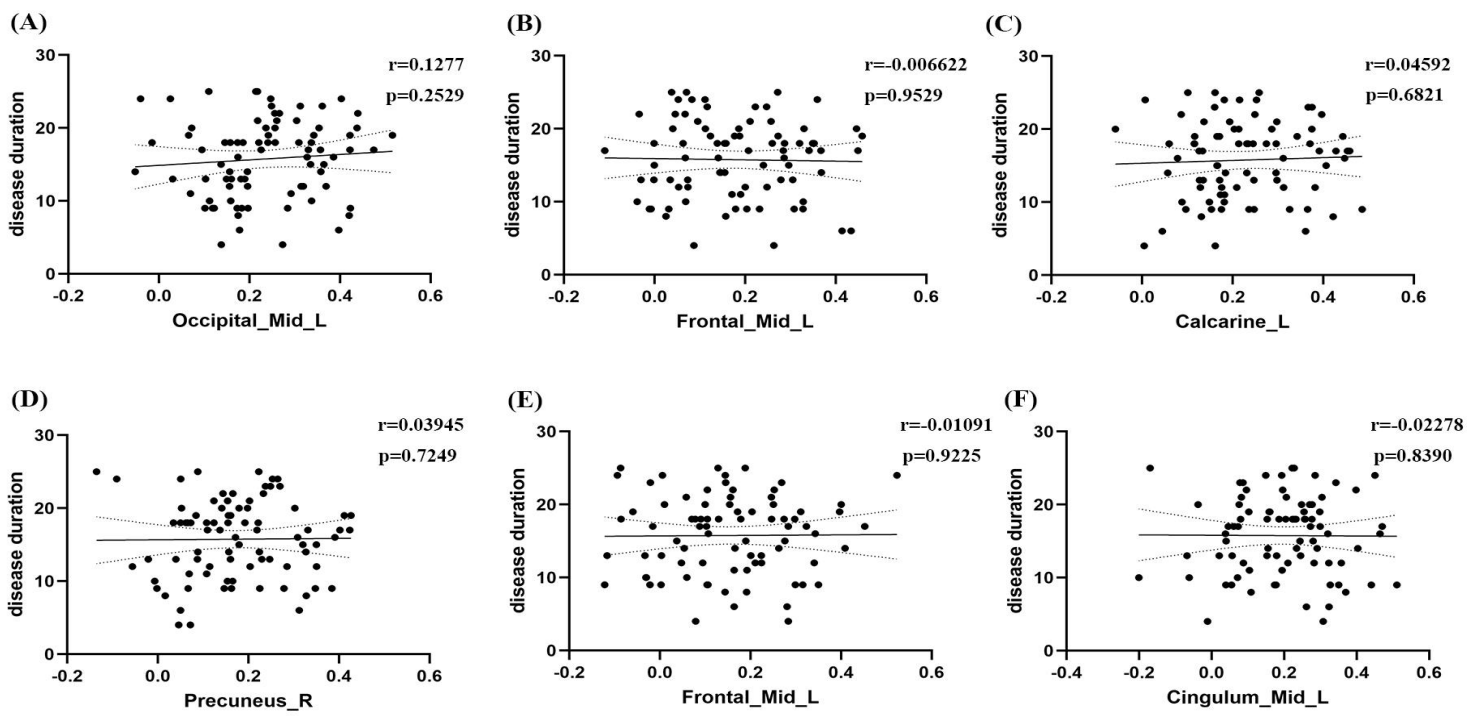

Figure S2. Spearman correlations between functional connectivity (FC) and disease duration (years) for the left amygdala with Occipital\_Mid\_L (A) and Frontal\_Mid\_L (B); Spearman correlations between FC and disease duration (years) for the right amygdala with Calcarine\_L (C), Precuneus\_R (D), Frontal\_Mid\_L (E), and Cingulum\_Mid\_L (F) (No statistically significant correlations were observed). Calcarine\_L, left calcarine fissure and surrounding cortex; Cingulum\_Mid\_L, left median cingulate and paracingulate gyri; Frontal\_Mid\_L, left middle frontal gyrus; Occipital\_Mid\_L, left middle occipital gyrus; Precuneus\_R, the right precuneus.

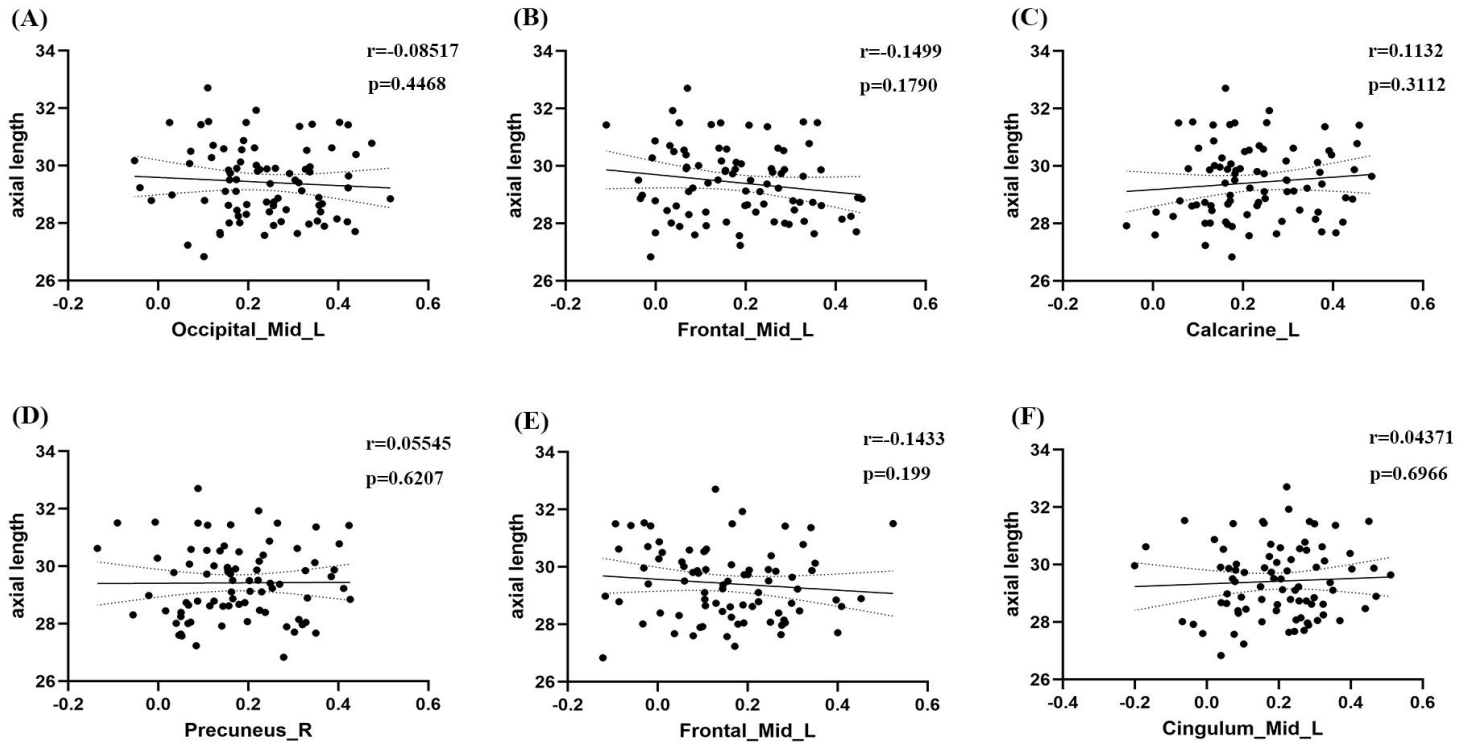

Figure S4. Spearman correlations between functional connectivity (FC) and axial length for the left amygdala with Occipital\_Mid\_L (A) and Frontal\_Mid\_L (B); Spearman correlations between FC and axial length for the right amygdala with Calcarine\_L (C), Precuneus\_R (D), Frontal\_Mid\_L (E), and Cingulum\_Mid\_L (F) (No statistically significant correlations were observed). Calcarine\_L, left calcarine fissure and surrounding cortex; Cingulum\_Mid\_L, left median cingulate and paracingulate gyri; Frontal\_Mid\_L, left middle frontal gyrus; Occipital\_Mid\_L, left middle occipital gyrus; Precuneus\_R, the right precuneus.

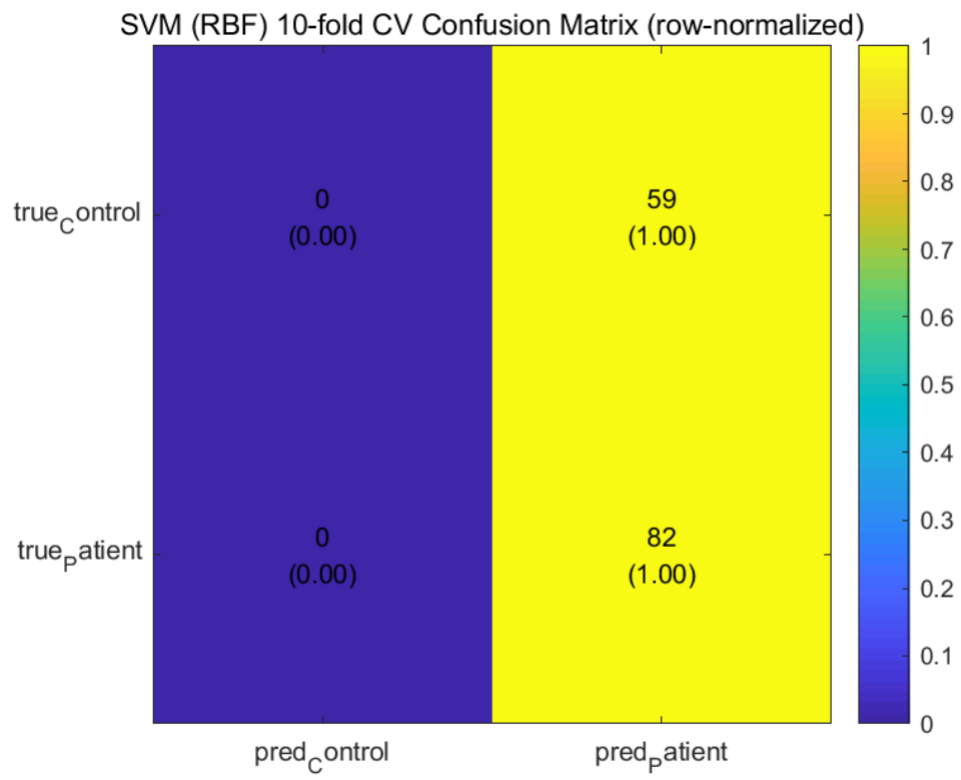

Figure S3. confusion matrix of SVM performance.
